# Supplementary material for: Quantification of the pace of biological aging in humans through a blood test, the DunedinPoAm DNA methylation algorithm
Source: eLife journal article supplement (doi:10.7554/elife.54870), 2020-05-05
Supplement: supp [file elife-54870-supp-v1.zip]

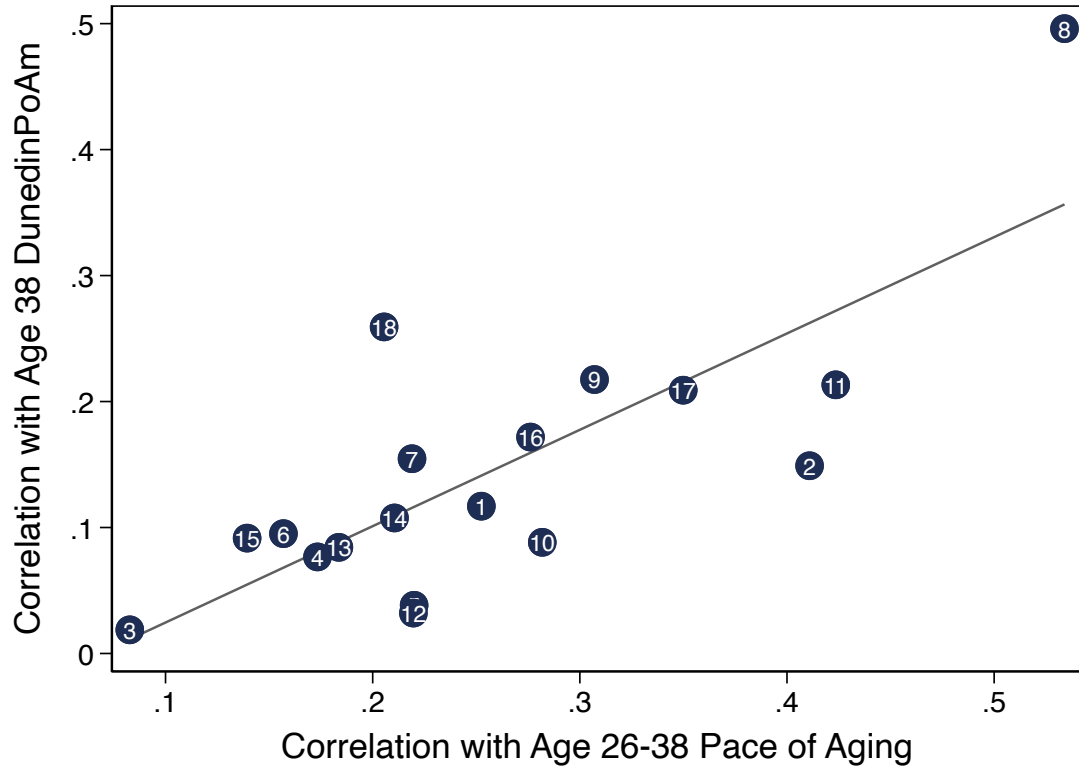

|    |                           |       | Correlation with Biomarker Slope |               |
|----|---------------------------|-------|----------------------------------|---------------|
| #  | Biomarker Name            |       | DunedinPoAm                      | Pace of Aging |
| 1  | ApoB100/ApoA1             |       | 0.12                             | 0.25          |
| 2  | BMI                       |       | 0.15                             | 0.41          |
| 3  | BUN                       |       | 0.02                             | 0.08          |
| 4  | Cardiorespiratory Fitness | (rev) | 0.08                             | 0.17          |
| 5  | Creatinine Clearance      | (rev) | 0.04                             | 0.22          |
| 6  | FEV1                      | (rev) | 0.10                             | 0.16          |
| 7  | FEV1/FVC                  | (rev) | 0.15                             | 0.22          |
| 8  | Gum health                |       | 0.50                             | 0.53          |
| 9  | HbA1C                     |       | 0.22                             | 0.31          |
| 10 | HDL cholesterol           | (rev) | 0.09                             | 0.28          |
| 11 | hsCRP                     |       | 0.21                             | 0.42          |
| 12 | Leukocyte Telomere Length | (rev) | 0.03                             | 0.22          |
| 13 | Lipoprotein (a)           |       | 0.08                             | 0.18          |
| 14 | Mean Arterial Pressure    |       | 0.11                             | 0.21          |
| 15 | Total Cholesterol         |       | 0.09                             | 0.14          |
| 16 | Triglycerides             |       | 0.17                             | 0.28          |
| 17 | Waist-hip ratio           |       | 0.21                             | 0.35          |
| 18 | White blood cell count    |       | 0.26                             | 0.21          |
