# Supplementary material for: Quantification of the pace of biological aging in humans through a blood test, the DunedinPoAm DNA methylation algorithm
Source: eLife journal article supplement (doi:10.7554/elife.54870), 2020-05-05
Supplement: supp [file elife-54870-supp-v1.zip]

Archive with 13 entries (13 files):
- elife_poa_e54870_Figure_1_figure_supplement_1.pdf
- elife_poa_e54870_Figure_1_figure_supplement_2.pdf
- elife_poa_e54870_Figure_1_figure_supplement_3.pdf
- elife_poa_e54870_Figure_2_figure_supplement_1.pdf
- elife_poa_e54870_Figure_2_figure_supplement_2.pdf
- elife_poa_e54870_Figure_2_figure_supplement_3.pdf
- elife_poa_e54870_Figure_3_figure_supplement_1.pdf
- elife_poa_e54870_Figure_4_figure_supplement_1.pdf
- elife_poa_e54870_Figure_5_figure_supplement_1.pdf
- elife_poa_e54870_Figure_6_figure_supplement_1.pdf
- elife_poa_e54870_Supplementary_file_1.docx
- elife_poa_e54870_Transparent_Reporting_File.docx
- elife_poa_e54870_Source_code_1.zip
