# Supplementary figures and images for: Quantification of the pace of biological aging in humans through a blood test, the DunedinPoAm DNA methylation algorithm
Source: eLife journal article supplement (doi:10.7554/elife.54870), 2020-05-05

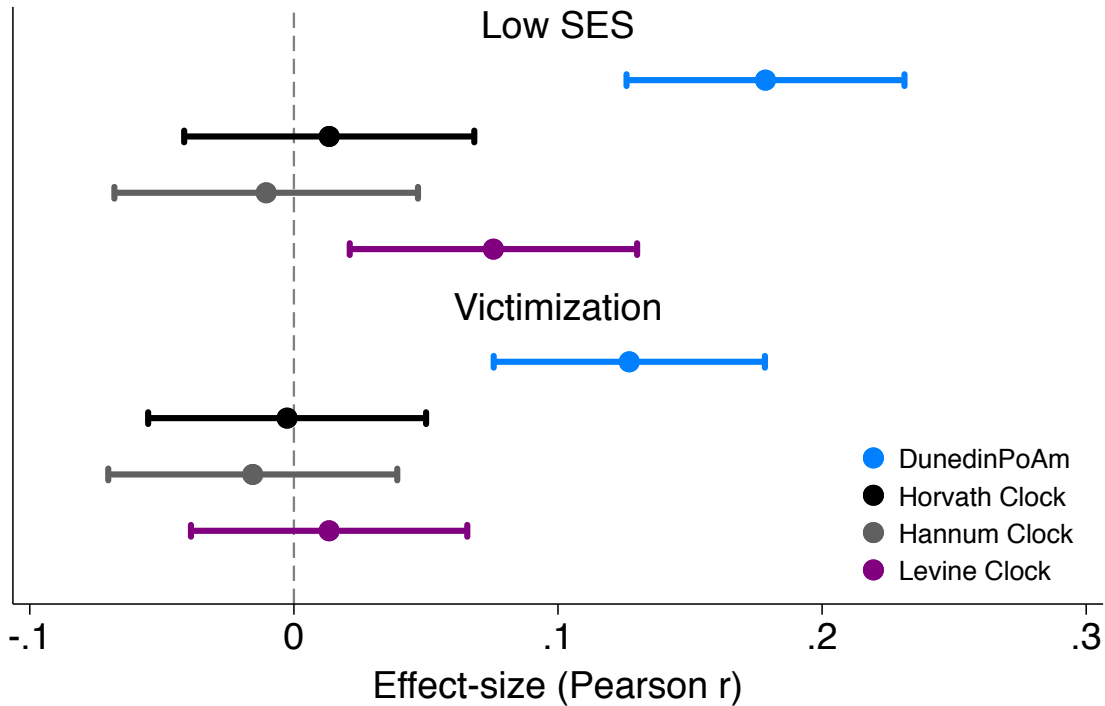

Supplement: supp [file elife-54870-supp-v1.zip]

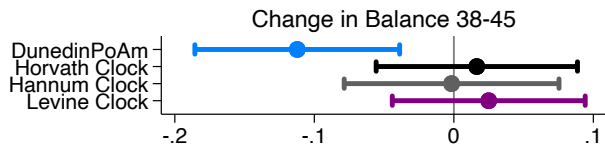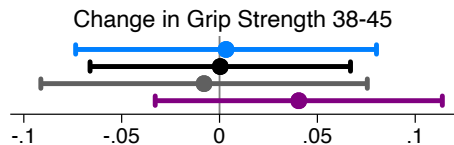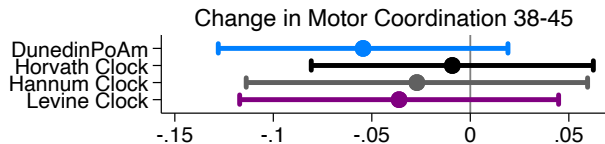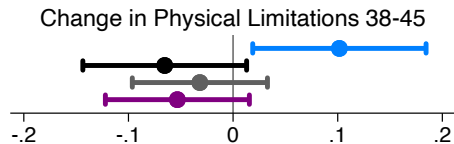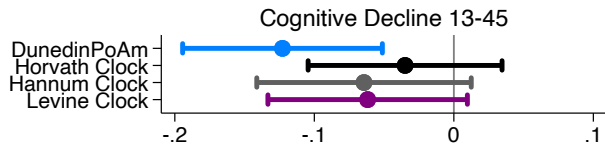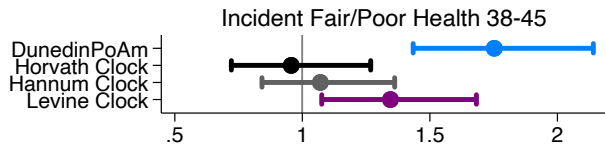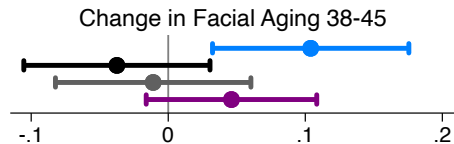

Effect-size

Supplement: supp [file elife-54870-supp-v1.zip]

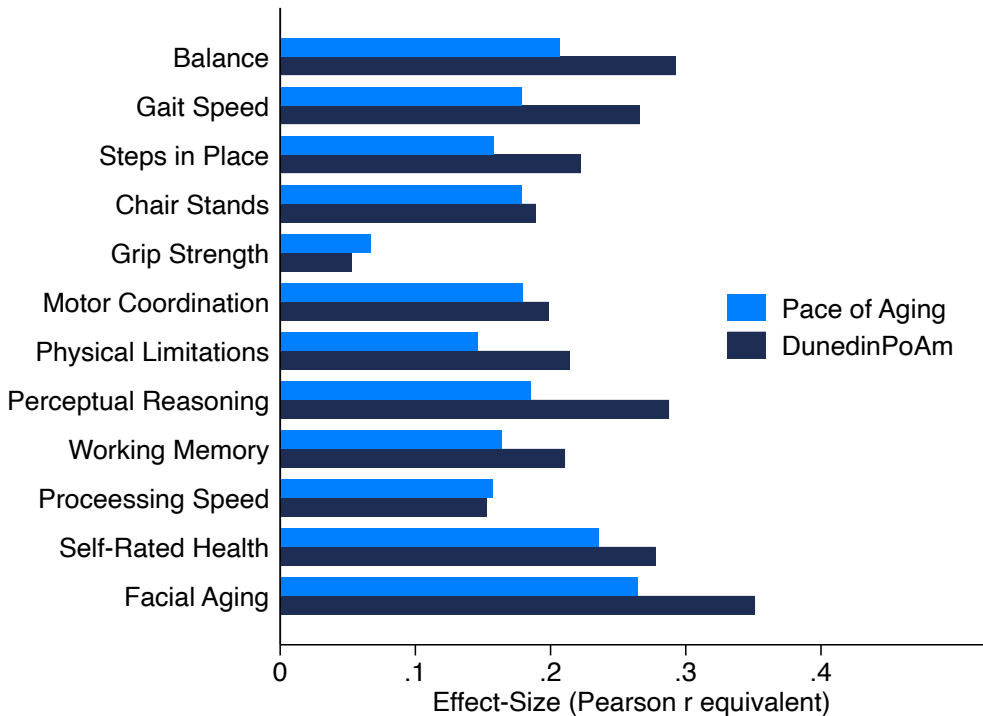

Supplement: supp [file elife-54870-supp-v1.zip]

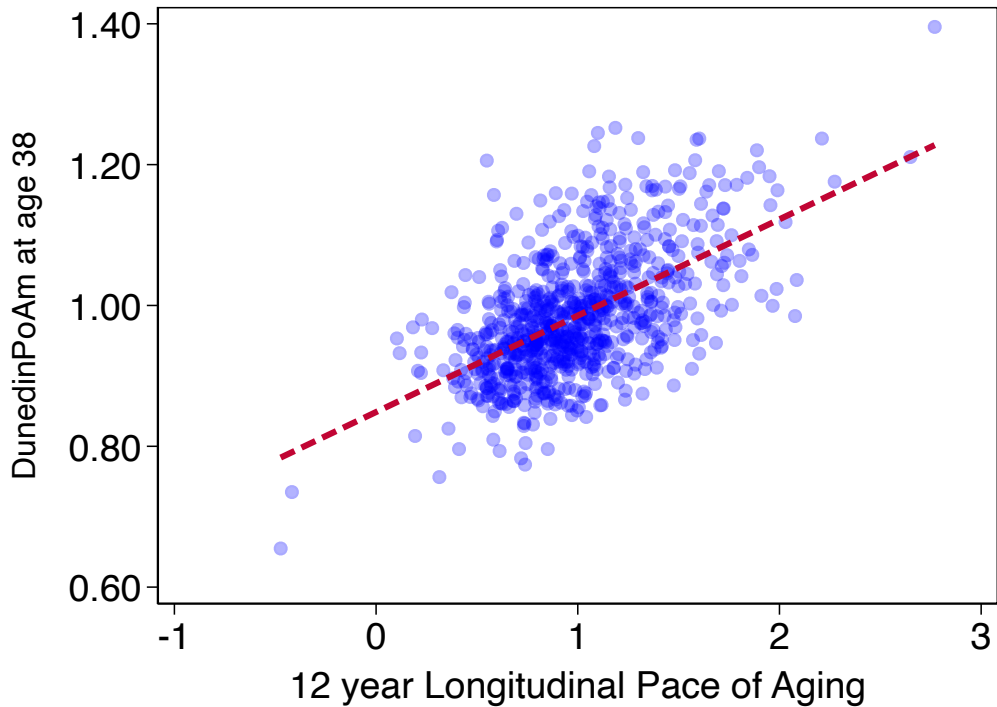

Supplement: supp [file elife-54870-supp-v1.zip]

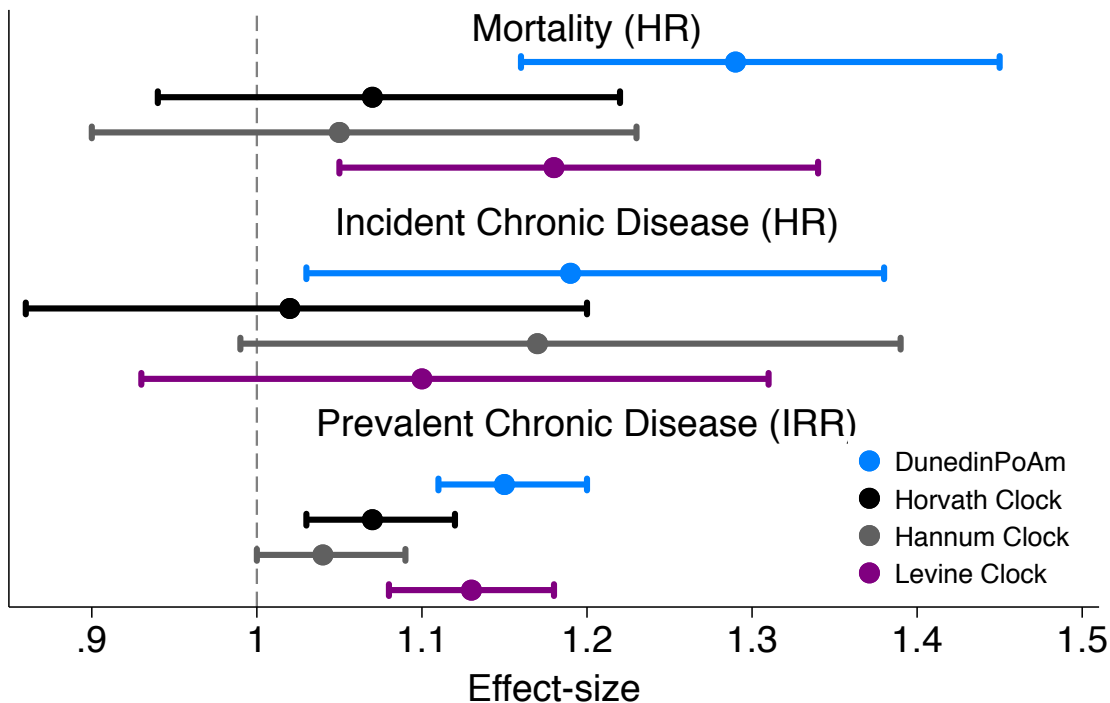

Supplement: supp [file elife-54870-supp-v1.zip]

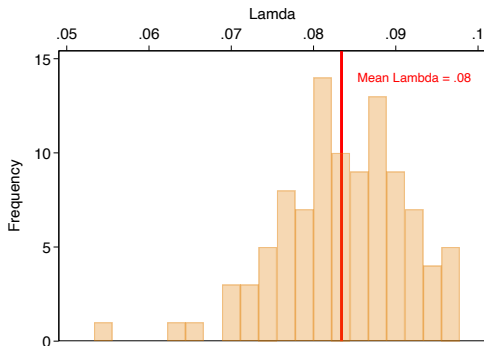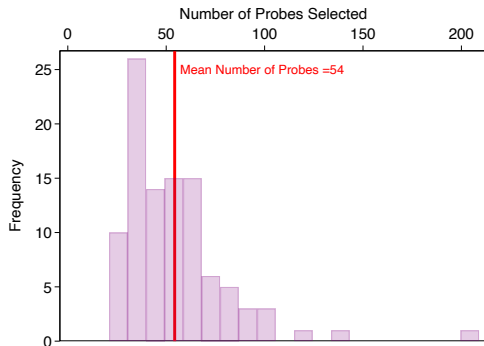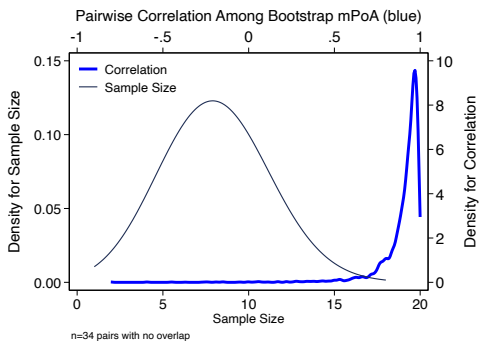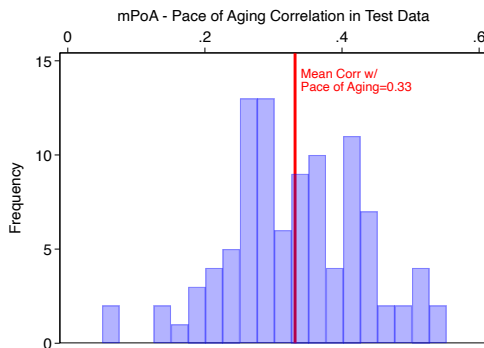

Supplement: supp [file elife-54870-supp-v1.zip]

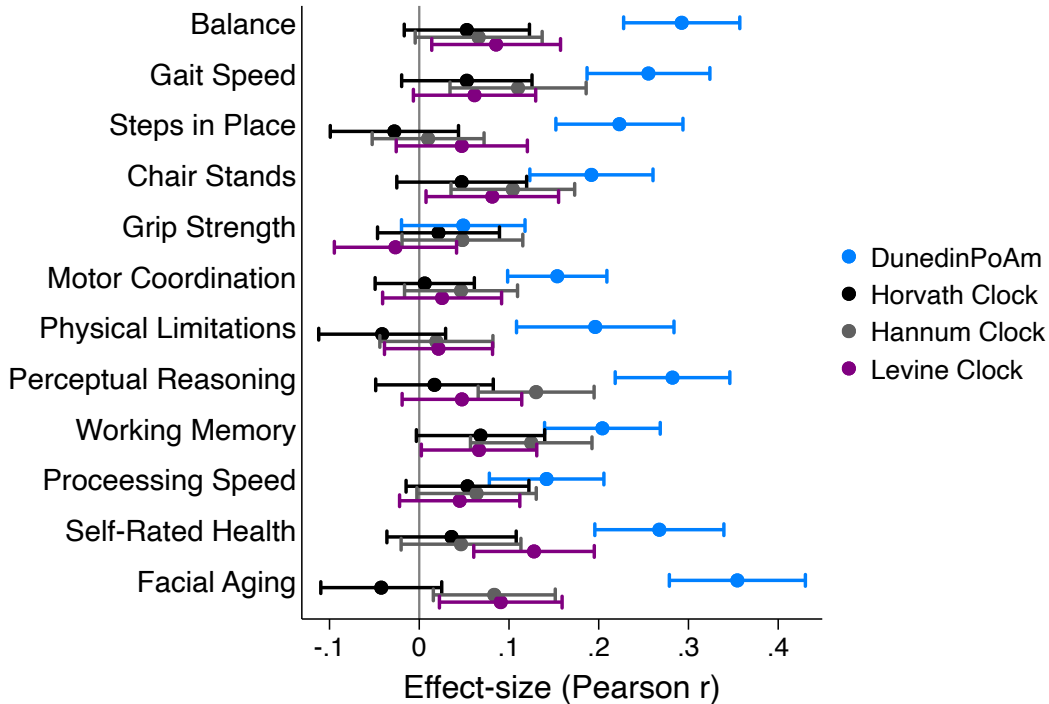

Supplement: supp [file elife-54870-supp-v1.zip]

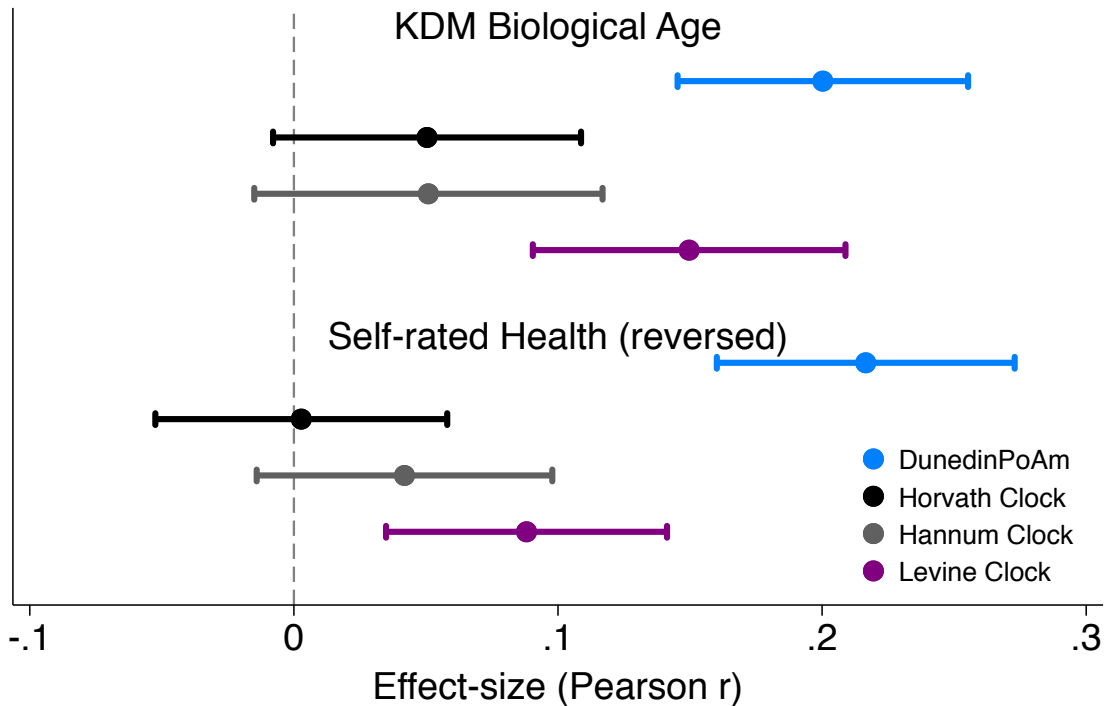

Supplement: supp [file elife-54870-supp-v1.zip]

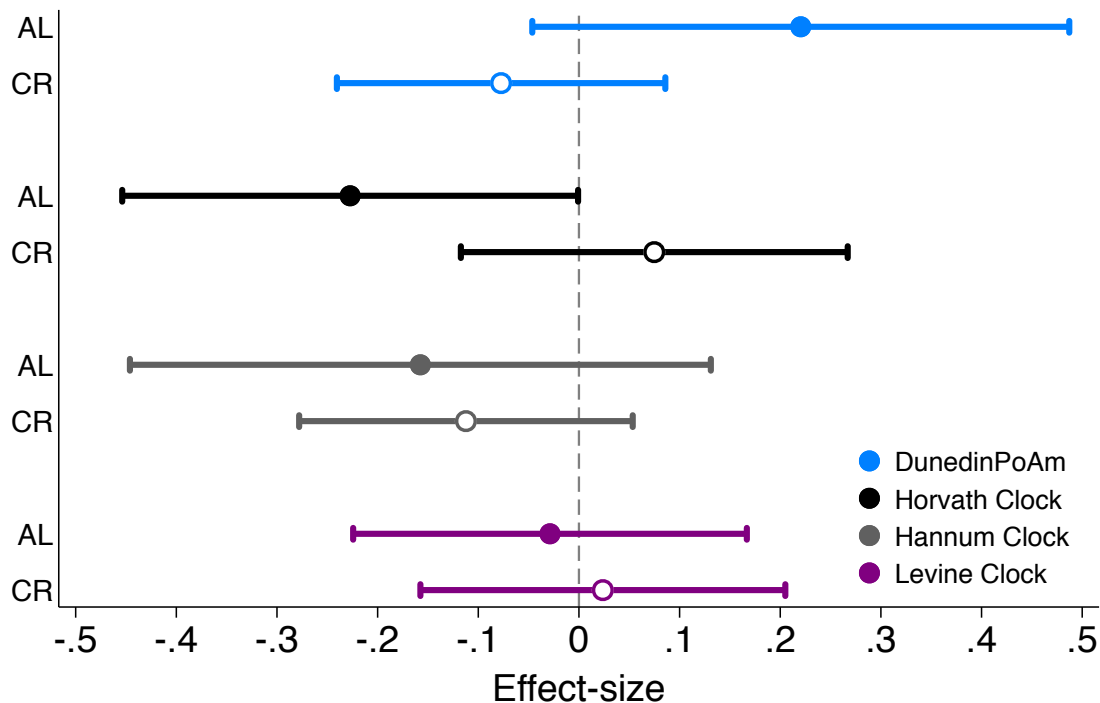

Supplement: supp [file elife-54870-supp-v1.zip]
